# Supplementary material for: Microfibrous-structured Al-fiber@ns-Al2O3 core–shell composite functionalized by Fe–Mn–K via surface impregnation combustion: as-burnt catalysts for synthesis of light olefins from syngas
Source: Royal Society of Chemistry journal article supplement (doi:10.1039/c5ra25212a), 2016-01-01
Supplement: c5ra25212a1.pdf [file c5ra25212a1.pdf]

## Supporting Information

### **Microfibrillar-structured Al-fiber@ns-Al<sub>2</sub>O<sub>3</sub> core-shell composite functionalized by Fe-Mn-K via surface impregnation combustion: as- burnt catalysts for synthesis of light olefins from syngas**

Lupeng Han, Chunzheng Wang, Jia Ding, Guofeng Zhao\*, Ye Liu, and Yong Lu\*

Shanghai Key Laboratory of Green Chemistry and Chemical Processes, School of Chemistry  
and Molecular Engineering, East China Normal University, Shanghai 200062, China.

Fax: (+86) 21-62233424

Email: [ylu@chem.ecnu.edu.cn](mailto:ylu@chem.ecnu.edu.cn) (Y. Lu); [gzhao@chem.ecnu.edu.cn](mailto:gzhao@chem.ecnu.edu.cn) (G. Zhao)

\* To whom correspondence should be addressed

### Calculation equations of CO conversion and products distribution

The CO conversion (%) was calculated by the N<sub>2</sub> internal standard method according to the following equation:<sup>30</sup>

$$X_{\text{CO}} = \frac{F_{\text{in}}X_{\text{CO,in}} - F_{\text{ex}}X_{\text{CO,ex}}}{F_{\text{in}}X_{\text{CO,in}}} \times 100 = \left(1 - \frac{X_{\text{N}_2,\text{in}} X_{\text{CO,ex}}}{X_{\text{N}_2,\text{ex}} X_{\text{CO,in}}}\right) \times 100$$

where  $F_{\text{in}}$  and  $F_{\text{ex}}$  denote the total flow rate of reactor inlet and outlet,  $X_{\text{CO,in}}$  and  $X_{\text{CO,ex}}$  the concentration of the CO in the reactor inlet and outlet,  $X_{\text{N}_2,\text{in}}$  and  $X_{\text{N}_2,\text{ex}}$  the concentration of the N<sub>2</sub> in the reactor inlet and outlet.

The hydrocarbon distribution toward the individual component (i) was calculated according to the amount of carbon atoms in a product with respect to the total carbon atoms as follows:

$$S_i (\%C) = \frac{n_i A_i M_i}{\sum n_i A_i M_i} \times 100$$

where  $n_i$  denotes the number of carbon atoms in product i,  $A_i$  the peak area of product i analyzed by chromatography, and  $M_i$  the relative mole correction factor of product i (relative to benzene).

**Table S1.** Textural properties of Al-fiber@ns-Al<sub>2</sub>O<sub>3</sub> composite and as-burnt catalysts.

| Sample                                                                    | S <sub>BET</sub><br>(m <sup>2</sup> /g) | Pore volume<br>(cm <sup>3</sup> /g) | Mean pore size<br>(nm) |
|---------------------------------------------------------------------------|-----------------------------------------|-------------------------------------|------------------------|
| Al-fiber@ns-Al <sub>2</sub> O <sub>3</sub>                                | 13.1                                    | 0.02                                | 5.5                    |
| Mesoporous ns-Al <sub>2</sub> O <sub>3</sub> shell                        | 187.1                                   | 0.26                                | 5.5                    |
| Al-fiber@ns-Al <sub>2</sub> O <sub>3</sub> @Fe-Mn-K (air)                 | 9.8                                     | 0.018                               | 4.8                    |
| Al-fiber@ns-Al <sub>2</sub> O <sub>3</sub> @Fe-Mn-K (N <sub>2</sub> )     | 3.4                                     | 0.012                               | 4.8                    |
| Al-fiber@ns-Al <sub>2</sub> O <sub>3</sub> @Fe-Mn-K (N <sub>2</sub> -air) | 8.2                                     | 0.018                               | 4.4                    |
| Al-fiber@ns-Al <sub>2</sub> O <sub>3</sub> @Fe-Mn-K (im)                  | 7.2                                     | 0.015                               | 11.7                   |

**Table S2.** Catalytic results from the literatures and this study.

| Catalyst                                                  | Fe<br>(wt%) | P<br>MPa | T<br>°C | H <sub>2</sub> /CO<br>ratio | GHSV<br>mL/(g·h) | CO<br>Conv.(%) | FTY<br>( $\mu\text{mol}_{\text{CO}}\text{g}_{\text{Fe}}^{-1}\text{s}^{-1}$ ) | HC distribution (%C) <sup>a</sup> |                                                          |                             |
|-----------------------------------------------------------|-------------|----------|---------|-----------------------------|------------------|----------------|------------------------------------------------------------------------------|-----------------------------------|----------------------------------------------------------|-----------------------------|
|                                                           |             |          |         |                             |                  |                |                                                                              | CH <sub>4</sub>                   | C <sub>2</sub> <sup>=</sup> -C <sub>4</sub> <sup>=</sup> | C <sub>5</sub> <sup>+</sup> |
| Al-fiber@ns-Al <sub>2</sub> O <sub>3</sub> @Fe-Mn-K (air) | 10          | 4.0      | 350     | 2:1                         | 10000            | 89.6           | 202.3                                                                        | 14.1                              | 42.1                                                     | 36.0                        |
| Fe/CNF (Ref. 4)                                           | 10          | 2.0      | 340     | 1:1                         | ~1000            | 88.0           | 29.8                                                                         | 13.0                              | 52.0                                                     | 18.0                        |
| Al-fiber@ns-Al <sub>2</sub> O <sub>3</sub> @Fe-Mn-K (air) | 10          | 2.0      | 340     | 1:1                         | 1000             | 49.9           | 19.3                                                                         | 19.1                              | 40.2                                                     | 31.7                        |
| Fe-K/N-CNTs (Ref. 3)                                      | 10          | 0.1      | 300     | 1:1                         | 4200             | 16.5           | 27.9                                                                         | 17.3                              | 54.6                                                     | 22.2                        |
| Al-fiber@ns-Al <sub>2</sub> O <sub>3</sub> @Fe-Mn-K (air) | 10          | 0.1      | 300     | 1:1                         | 4200             | 2.0            | 4.1                                                                          | 13.5                              | 50.7                                                     | 25.4                        |
| Fe/MnK-CNTs (Ref. 10)                                     | 7.9         | 2.0      | 270     | 1:1                         | 30000            | 22.7           | 311.7                                                                        | 28.8                              | 50.3                                                     | 13.3                        |
| Al-fiber@ns-Al <sub>2</sub> O <sub>3</sub> @Fe-Mn-K (air) | 10          | 2.0      | 270     | 1:1                         | 30000            | 1.6            | 23.7                                                                         | 15.1                              | 45.5                                                     | 33.2                        |
| Fe/N-Graphene (Ref. 17)                                   | 8           | 0.5      | 340     | 1:1                         | 600              | 8.8            | 3.5                                                                          | 21.4                              | 49.6                                                     | 19.8                        |
| Al-fiber@ns-Al <sub>2</sub> O <sub>3</sub> @Fe-Mn-K (air) | 10          | 0.5      | 340     | 1:1                         | 600              | 26.0           | 7.5                                                                          | 9.6                               | 23.3                                                     | 63                          |

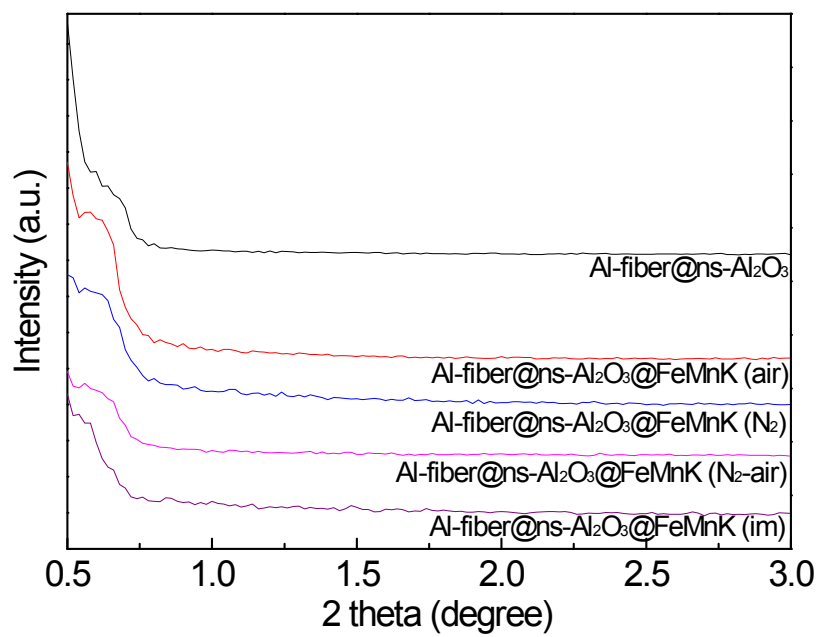

**Fig. S1.** The SAXD patterns of Al-fiber@ns-Al<sub>2</sub>O<sub>3</sub> composite and different Al-fiber@ns-Al<sub>2</sub>O<sub>3</sub>@Fe-Mn-K catalysts.
